# Supplementary material
Source: PubMed Central journal article supplement (PMC3063597)
Supplement: 1000091107_pnas.201000091SI.pdf [file 1000091107_pnas.201000091SI.pdf]

# Supporting Information

Scott et al. 10.1073/pnas.1000091107

## SI Materials and Methods

**Microarray Hybridization Analysis.** The fluorescence of each spot was measured in two channels using a GeneTAC LS IV (Genomic Solutions) using GTLS software. The microarray data were log<sub>2</sub> transformed and normalized by Loess normalization to remove intensity-dependent dye effects. Because each clone was represented by three spots, we calculated the median of the three log<sub>2</sub> (Cy5/Cy3) values, a robust measure of relative gene expression. In total, the fluorescence of 12 hybridizing spots was compared for each clone. *P* values were calculated by applying a one-sample *t* test to the two log ratios from the two replicate experiments, whereas the two dye-swapped arrays within each experiment were combined by averaging. Because these *P* values were based on only two biological replicates, they were not used as the main selection criterion. Instead, a threshold of at least 5-fold induction was used to select clones for further analysis. The whole experiment conformed to the Minimum Information about a Microarray Experiment (MIAME) criteria for the documentation of microarray experiments.

**Reverse Transcription–Quantitative PCR.** Primers were designed and checked using Netprimer to specifically amplify fragments of 80–200 bp from selected clones. The optimal annealing temperature for each primer pair was determined in a standard PCR amplification, using the appropriate clone DNA as a template, in a gradient PCR machine (Bio-Rad) capable of running eight different annealing temperatures simultaneously. The same RNA purification (10 ng) used to hybridize to the array slides was reverse-transcribed using the iScript cDNA synthesis kit (Bio-Rad). Aliquots of the resulting cDNA (2 μL) were used in quantitative PCR (Q-PCR) amplifications using the Bio-Rad iCycler iQ and incorporating specific primers in the iQ SYBR Green Supermix (Bio-Rad), according to the manufacturer's recommendations. Control samples lacking the reverse-transcriptase enzyme were included to assess DNA contamination of the RNA sample, and triplicate samples of a 5-fold dilution series were amplified in each case. Amplification conditions were 1 cycle of 95 °C for 3 min followed by 40 cycles of 95 °C for 30 s and the specific annealing temperature for 30 s, with a final melt curve-analysis step (heating the PCR mixture from 52 °C to 95 °C by 1 °C every 10 s) to confirm specificity of amplification and lack of primer dimers.

The value used for comparison was the threshold cycle (*C<sub>t</sub>*), the cycle number at which the fluorescence is above the baseline level (set at 200). The *C<sub>t</sub>* values for RNA purified from each substrate were compared with the values for glucose to determine the fold difference, or gene induction, relative to growth on glucose. The *C<sub>t</sub>* values were first converted from a logarithmic to a linear scale using the formula  $x = 2^{-C_t}$ , and the larger of these mean values was divided by the smaller to obtain the fold difference (1). The log-transformed data were analyzed using residual maximum likelihood (REML) with substrate, gene, and their interaction as fixed effects followed by a posthoc *t* test to compare substrate means.

**TLC.** Samples and standards were separated on TLC plates (K5 silica gel plates) from Whatman 4850–820 using a butanol:acetic acid:water solvent in a ratio of 5:4:1. Samples and standards were applied to the plate, 1 cm from the bottom at 1-cm intervals, applying a total of 1 μL in 0.5-μL aliquots, allowing to dry before subsequent applications. The standard ladder was a mix of 1% substrates comprised of glucose, fructose, sucrose, GF4 (1-fructofuranosylntose), GF3 (nystose), and GF2 (kestose). Separation was carried out until the solvent front was 1 cm from the top of the

plate; the plate was allowed to dry and then, it was rerun in the same way and allowed to dry. Spots were visualized by spraying the plate with 0.2% orcinol in methanol:sulphuric acid (90:10) and heating at 105 °C for 10 min or until spots became visible.

**FISH.** Samples (0.5 mL) were removed from triplicate bacterial cocultures on Synergy1 after 0, 4, 8, and 24 h and after 0, 6, 10, and 24 h from triplicate bacterial cocultures on inulin, maintaining anaerobic conditions. Samples were fixed by mixing in a 1:3 ratio in 4% (wt/vol) paraformaldehyde at 4 °C for 16 h and 0.5-mL aliquots stored at –20 °C. FISH analysis was performed as described by Walker et al. (2).

Hybridized cells were counted automatically using an Olympus BX61 upright fluorescence microscope with a digital imaging system; 30 microscopic fields were counted per experimental sample. The samples were hybridized to the Erec482 probe to specifically detect *Roseburia inulinivorans* and the Bif164 probe to enumerate *Bifidobacterium longum*. Total bacterial numbers were estimated using the universal probe Eub338. Details of these probes are contained within ref. 2.

**Total Protein Extraction.** Bacterial cultures (7.5 mL) were centrifuged (5,000 × *g*, 10 min, 4 °C), and the pellet was washed three times with 1 mL of ice-cold washing Buffer (10 mM Tris-HCl, pH 7.4, 100 mM sucrose). Final pellets were resuspended in 300 μL of freshly prepared Extraction buffer (7 M urea, 2 M thiourea, 4% CHAPS, 2% BioRad BioLyte, pH 3–10) and sonicated (8 × 30-s bursts, with cooling on ice, using a Soniprep 150). Alternatively, the pellets were stored frozen at –80 °C. After sonication, the samples were centrifuged (13,000 × *g*, 15 min, 12 °C), and the supernatant was divided into 60-μL aliquots and frozen until further use. Total protein concentration was assayed by Bradford method (3) using BSA (Sigma Aldrich) as a standard.

**2D Gel Electrophoresis.** Sonicated protein extracts were thawed at room temperature. A total of 150 μg protein was loaded for each gel, and the sample volume was adjusted to 340 μL by adding the Extraction buffer and 15 μL 30% DTT. The samples were disrupted for 5 min in a water-bath Decon F5100b sonicator (RT; Decon Laboratories Ltd) and centrifuged (13,000 × *g*, 5 min, 20 °C), and the supernatant was applied to 17-cm Immobilized pH gradient (IPG) strips (pH 4–7) (BioRad). Strip rehydration and 1D isoelectrofocusing was carried out in Proteom IsoElectric Focusing Cells (BioRad) using the following parameters: passive rehydration: 1 h, 20 °C; active rehydration: 50 V, 18 h, 20 °C; isoelectrofocusing: step 1, 250 V, 15 min; isoelectrofocusing: step 2, stepwise increase in voltage to 10,000 V over 3 h; isoelectrofocusing: step 3, 10,000 V until a total of 60,000 Vh had been applied. Afterward, the strips were equilibrated for 15 min in Reduction buffer (6 M urea, 2% SDS, 375 mM Tris-HCl, pH 8.8, 20% glycerol, 130 mM DTT) followed by a 15-min incubation in Alkylation buffer (6 M urea, 2% SDS, 375 mM Tris-HCl, pH 8.8, 20% glycerol, 135 mM iodoacetamide) using freshly prepared buffers; 2D slab electrophoresis was performed on 8–16% gradient polyacrylamide gels using the Hoefer ISO-DALT deca-gel System (200 V, 9 h, 4 °C), and gels were then stained with colloidal Coomassie blue (0.01%) as previously described (4). To assess reproducibility, samples were purified from five independently growing bacterial cultures, and each sample was run in triplicate, yielding a total of 15 gels for each growth condition.

Gels were scanned and digitized and then, they were analyzed using PDQuest version 7.0.1 software (BioRad). For qualitative comparisons, total spot-volume normalization was performed (i.e., density value of a given spot was calculated as a percentage of the sum of volumes of all spots detected and present on all gels) (5). The apparent abundance of any protein spot was considered conserved when the overall gel-to-gel variation did not exceed a factor of 2. Pairwise comparisons between resolved proteomes of cultures grown in a medium supplemented with the appropriate growth substrate were made using at least six gels (from three biological replicates) for each of the compared growth conditions.

Protein spots displaying the greatest increases in their apparent intracellular abundance in the proteomes of *R. inulinivorans* A2-194 cells grown in the presence of either inulin or starch were chosen for subsequent liquid chromatography-tandem mass spectrometry (LC-MS/MS) analysis.

**LC-MS/MS and Protein Identification.** In-gel digestion with trypsin (Promega) and extraction of proteins from gel slices were conducted using a MassPrep station (MicroMass), according to the manufacturer's instructions. MS data from tryptic peptide mixtures were obtained using an Ultimate pump, Famos auto-sampler, and Switchos microcolumn switching device (LC Packings) interfaced with the nanoflow electrospray ionization (ESI) source of a hybrid quadrupole linear ion trap (Q-Trap) mass spectrometer (Applied Biosystems). The LC-MS/MS analyses were performed at the Rowett Research Institute. For protein identification, the acquired LC-MS/MS spectra were searched using Mascot (<http://www.matrixscience.com>) (6) and the NCBI nr and UniProt KB/TrEMBL databases (<http://www.ebi.ac.uk/uniprot>) followed by individual inspection of the matched peptides.

- Hancock LE, Shepard BD, Gilmore MS (2003) Molecular analysis of the *Enterococcus faecalis* serotype 2 polysaccharide determinant. *J Bacteriol* 185:4393–4401.
- Walker AW, Duncan SH, McWilliam Leitch EC, Child MW, Flint HJ (2005) pH and peptide supply can radically alter bacterial populations and short-chain fatty acid ratios within microbial communities from the human colon. *Appl Environ Microbiol* 71:3692–3700.
- Bradford MM (1976) A rapid and sensitive method for quantitation of microgram quantities of proteins utilizing the principle of protein-dye binding. *Anal Biochem* 72:248–254.
- Anderson NL, et al. (1994) *Two Dimensional Gel Electrophoresis: Operation of the ISO-DALT System* (Large Scale Biology Press, Rockville, MD), 2nd Ed.
- Choe LH, Lee KH (2003) Quantitative and qualitative measure of intralaboratory two-dimensional protein gel reproducibility and the effects of sample preparation, sample load, and image analysis. *Electrophoresis* 24:3500–3507.
- Perkins DN, Pappin DJ, Creasy DM, Cottrell JS (1999) Probability-based protein identification by searching sequence databases using mass spectrometry data. 20:3551–3567.

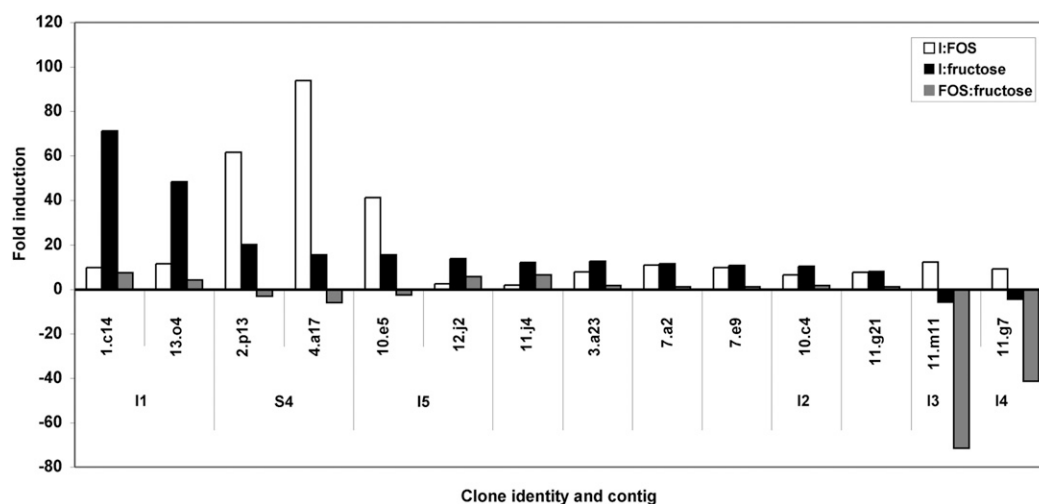

**Fig. S1.** Relative induction of selected genes (clones) on inulin, fructo-oligosaccharides (FOS), and fructose in pair-wise comparisons after microarray analysis. I:FOS, induction on inulin compared with FOS; I:fructose, induction on inulin compared with fructose; FOS:fructose, induction on FOS compared with fructose. Negative values indicate induction on the substrate shown second. Clone identities and related contigs are indicated as appropriate.

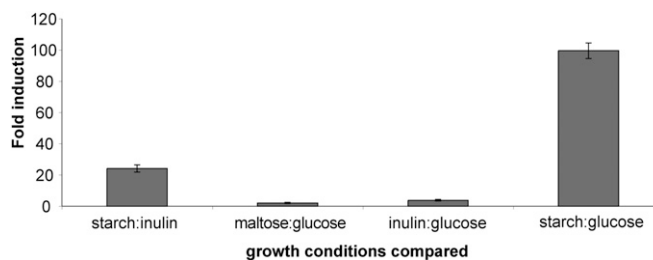

**Fig. S2.** Results of reverse transcription-Q-PCR (RT-Q-PCR) amplification of the flagellin gene *FlaA*. Primer pairs were used to amplify mRNA extracted from cells during exponential growth [optical density (OD)<sub>650</sub> = 0.4] on glucose, maltose, starch, and inulin (Dahlia inulin; Sigma). The fold induction of the data converted from logarithmic to linear scale ( $x = 2^{-Ct}$ ) was calculated relative to the glucose standard. The expression of *FlaA* on starch compared with inulin was compared directly in a separate experiment. Results are the means of nine independent RT-Q-PCR amplifications.













**Table S3. Sequences producing significant alignments using Blast P, searching with A2-194  $\beta$ -fructofuranosidase sequence (July 20, 2010)**

| Accession no.  | Description                                                                             | Max score | E value | Identity (%) |
|----------------|-----------------------------------------------------------------------------------------|-----------|---------|--------------|
| ZP_03755395.1  | Hypothetical protein ROSEINA2194_03834 [Roseburia inulinivorans DSM 16841]              | 1068      | 0       | 100          |
| ZP_03801019.1  | Hypothetical protein COPCOM_03306 [Coprococcus comes ATCC 27758]                        | 840       | 0       | 79           |
| YP_002936195.1 | Sucrose-6-phosphate hydrolase [Eubacterium rectale ATCC 33656]                          | 780       | 0       | 73           |
| CBK92563.1     | Sucrose-6-phosphate hydrolase [Eubacterium rectale M104/1]                              | 780       | 0       | 72           |
| CBK92067.1     | Sucrose-6-phosphate hydrolase [Eubacterium rectale DSM 17629]                           | 780       | 0       | 73           |
| CBL20803.1     | Sucrose-6-phosphate hydrolase [Ruminococcus sp. SR1/5]                                  | 683       | 0       | 63           |
| ZP_02040442.1  | Hypothetical protein RUMGNA_01206 [Ruminococcus gnavus ATCC 29149]                      | 677       | 0       | 63           |
| ZP_01994901.1  | Hypothetical protein DORLON_00890 [Dorea longicatena DSM 13814]                         | 594       | 1e-167  | 57           |
| CBK82500.1     | Beta-fructosidases (levanase/invertase) [Coprococcus sp. ART55/1]                       | 558       | 4e-157  | 52           |
| CBK83251.1     | Beta-fructosidases (levanase/invertase) [Coprococcus sp. ART55/1]                       | 532       | 4e-149  | 53           |
| ZP_02205360.1  | Hypothetical protein COPEUT_00119 [Coprococcus eutactus ATCC 27759]                     | 529       | 4e-148  | 52           |
| YP_001310947.1 | Sucrose-6-phosphate hydrolase [Clostridium beijerinckii NCIMB 8052]                     | 518       | 8e-145  | 48           |
| ZP_06597629.1  | Sucrose-6-phosphate hydrolase [Oribacterium sp. oral taxon 078 str. F0262]              | 516       | 3e-144  | 47           |
| ZP_02075141.1  | Hypothetical protein CLOL250_01917 [Clostridium sp. L2-50]                              | 511       | 9e-143  | 47           |
| ZP_05853370.1  | Sucrose-6-phosphate hydrolase [Blautia hansenii DSM 20583]                              | 509       | 2e-142  | 46           |
| CBL25413.1     | Beta-fructosidases (levanase/invertase) [Ruminococcus torques L2-14]                    | 495       | 7e-138  | 47           |
| ZP_01963924.1  | Hypothetical protein RUMOBE_01648 [Ruminococcus obeum ATCC 29174]                       | 491       | 9e-137  | 46           |
| ZP_04857545.1  | Sucrose-6-phosphate hydrolase [Ruminococcus sp. 5_1_39B_FAA]                            | 480       | 2e-133  | 46           |
| ZP_05615941.1  | Sucrose-6-phosphate hydrolase [Faecalibacterium prausnitzii A2-165]                     | 470       | 2e-130  | 47           |
| CBK98452.1     | Beta-fructosidases (levanase/invertase) [Faecalibacterium prausnitzii L2-6]             | 468       | 7e-130  | 48           |
| CBK75003.1     | Beta-fructosidases (levanase/invertase) [Butyrivibrio fibrisolvens 16/4]                | 455       | 8e-126  | 43           |
| ZP_05981823.1  | Sucrose-6-phosphate hydrolase [Subdoligranulum variabile DSM 15176]                     | 379       | 5e-103  | 39           |
| YP_003477892.1 | Sucrose-6-phosphate hydrolase [Thermoanaerobacter italicus Ab9]                         | 367       | 2e-99   | 40           |
| ZP_06598787.1  | Sucrose-6-phosphate hydrolase [Oribacterium sp. oral taxon 078 str. F0262]              | 362       | 6e-98   | 40           |
| ZP_05492959.1  | Sucrose-6-phosphate hydrolase [Thermoanaerobacter ethanolicus CCSD1]                    | 361       | 2e-97   | 39           |
| YP_003677389.1 | Sucrose-6-phosphate hydrolase [Thermoanaerobacter mathranii subsp. mathranii str. A3]   | 356       | 5e-96   | 39           |
| YP_003477499.1 | Sucrose-6-phosphate hydrolase [Thermoanaerobacter italicus Ab9]                         | 355       | 6e-96   | 39           |
| YP_001662752.1 | Sucrose-6-phosphate hydrolase [Thermoanaerobacter sp. X514]                             | 354       | 1e-95   | 39           |
| YP_003598941.1 | Sucrose-6-phosphate hydrolase [Bacillus megaterium DSM319]                              | 353       | 2e-95   | 40           |
| ZP_04788153.1  | Sucrose-6-phosphate hydrolase [Thermoanaerobacter brockii subsp. finii Ako-1]           | 352       | 7e-95   | 39           |
| ACN59531.1     | Invertase [uncultured bacterium]                                                        | 352       | 7e-95   | 38           |
| ZP_05336575.1  | Sucrose-6-phosphate hydrolase [Thermoanaerobacterium thermosaccharolyticum DSM 571]     | 347       | 2e-93   | 37           |
| YP_001907823.1 | Sucrose-6-phosphate hydrolase [Erwinia tasmaniensis Et1/99]                             | 343       | 3e-92   | 38           |
| ZP_02693416.1  | Sucrose-6-phosphate hydrolase [Epulopiscium sp. 'N.t. morphotype B']                    | 343       | 3e-92   | 37           |
| YP_001664628.1 | Sucrose-6-phosphate hydrolase [Thermoanaerobacter pseudethanolicus ATCC 33223]          | 343       | 3e-92   | 39           |
| ZP_05657431.1  | Beta-fructofuranosidase/sucrose 6 phosphate hydrolase [Enterococcus casseliflavus EC20] | 342       | 6e-92   | 39           |
| ZP_05654203.1  | Beta-fructofuranosidase/sucrose 6 phosphate hydrolase [Enterococcus casseliflavus EC10] | 341       | 2e-91   | 37           |
| ZP_05647830.1  | Beta-fructofuranosidase/sucrose 6 phosphate hydrolase [Enterococcus casseliflavus EC30] | 338       | 1e-90   | 38           |
| YP_003472710.1 | Sucrose-6-phosphate hydrolase [Staphylococcus lugdunensis HKU09-01]                     | 329       | 6e-88   | 38           |
| ZP_03992025.1  | Possible beta-fructofuranosidase [Oribacterium sinus F0268]                             | 328       | 1e-87   | 38           |
| YP_081250.1    | Glycoside hydrolase family protein [Bacillus licheniformis ATCC 14580]                  | 326       | 5e-87   | 38           |
| YP_001422743.1 | Hypothetical protein RBAM_031820 [Bacillus amyloliquefaciens FZB42]                     | 324       | 2e-86   | 38           |
| YP_176610.1    | Sucrose-6-phosphate hydrolase [Bacillus clausii KSM-K16]                                | 323       | 4e-86   | 40           |
| ZP_05660310.1  | Glycosylhydrolase [Enterococcus faecium 1,230,933]                                      | 323       | 5e-86   | 38           |
| YP_003562050.1 | Sucrose-6-phosphate hydrolase [Bacillus megaterium QM B1551]                            | 322       | 6e-86   | 38           |
| YP_003596774.1 | Sucrose-6-phosphate hydrolase [Bacillus megaterium DSM319]                              | 322       | 6e-86   | 38           |
| AAM19071.1     | Beta-fructosidase FruA [Bacillus megaterium]                                            | 322       | 1e-85   | 38           |
| ZP_05674260.1  | Beta-fructofuranosidase/sucrose 6 phosphate hydrolase                                   | 321       | 2e-85   | 37           |
| ZP_04783183.1  | Beta-fructofuranosidase [Weissella paramesenteroides ATCC 33313]                        | 321       | 2e-85   | 36           |
| ZP_05404140.1  | Sucrose-6-phosphate hydrolase [Mitsuokella multacidia DSM 20544]                        | 318       | 1e-84   | 36           |
| ZP_05737371.1  | Sucrose-6-phosphate hydrolase [Granulicatella adiacens ATCC 49175]                      | 317       | 2e-84   | 38           |
| ZP_03958139.1  | Beta-fructofuranosidase [Lactobacillus ruminis ATCC 25644]                              | 315       | 1e-83   | 38           |
| ZP_03624709.1  | Glycosyl hydrolase family 32 domain protein [Streptococcus suis 89/1591]                | 314       | 2e-83   | 38           |
| ZP_06189775.1  | Sucrose-6-phosphate hydrolase [Serratia odorifera 4Rx13]                                | 312       | 6e-83   | 36           |
| YP_003620449.1 | Hypothetical protein LKI_10506 [Leuconostoc kimchii IMSNU 11154]                        | 312       | 7e-83   | 35           |
| YP_002249945.1 | Raffinose invertase [Dictyoglomus thermophilum H-6-12]                                  | 311       | 2e-82   | 36           |
| YP_001200910.1 | Beta-fructosidases (levanase/invertase) [Streptococcus suis 98HAH33]                    | 310       | 2e-82   | 37           |
| XP_623540.2    | PREDICTED: hypothetical protein [Apis mellifera]                                        | 310       | 4e-82   | 37           |
| YP_002741065.1 | Sucrose-6-phosphate hydrolase [Streptococcus pneumoniae 70585]                          | 310       | 4e-82   | 37           |
| ZP_06900985.1  | Sucrose-6-phosphate hydrolase [Streptococcus parasanguinis ATCC 15912]                  | 309       | 6e-82   | 43           |
| YP_002736736.1 | Sucrose-6-phosphate hydrolase [Streptococcus pneumoniae JJA]                            | 308       | 9e-82   | 37           |
| NP_359209.1    | Sucrose-6-phosphate hydrolase, putative [Streptococcus pneumoniae R6]                   | 308       | 1e-81   | 37           |

BlastP output of sequences producing significant alignments (>35% identity) to the A2-194  $\beta$ -fructofuranosidase in a BlastP database search performed on July 20, 2010.
